# Supplementary material for: Short lifespan of syngeneic transplanted MSC is a consequence of in vivo apoptosis and immune cell recruitment in mice
Source: PubMed Central journal article supplement (PMC8169682; doi:10.1038/s41419-021-03839-w), 2021-06-02
Supplement: 41419_2021_3839_MOESM3_ESM.pdf [file 41419_2021_3839_MOESM3_ESM.pdf]

## Supplemental Information

### Short lifespan of syngeneic transplanted MSC is a consequence of *in vivo* apoptosis and immune cell recruitment in mice

Mihai Bogdan Preda<sup>1\*</sup>, Carmen Alexandra Neculachi<sup>1</sup>, Ioana Madalina Fenyo<sup>2</sup>, Ana-Maria Vacaru<sup>2</sup>, Mihai Alin Publik<sup>1</sup>, Maya Simionescu<sup>1,2</sup>, Alexandrina Burlacu<sup>1</sup>

<sup>1</sup>Laboratory of Stem Cell Biology, Institute of Cellular Biology and Pathology “Nicolae Simionescu”, Bucharest, Romania

<sup>2</sup>Laboratory of Gene Regulation and Molecular Therapies, Institute of Cellular Biology and Pathology “Nicolae Simionescu”, Bucharest, Romania

## Supplemental Figures

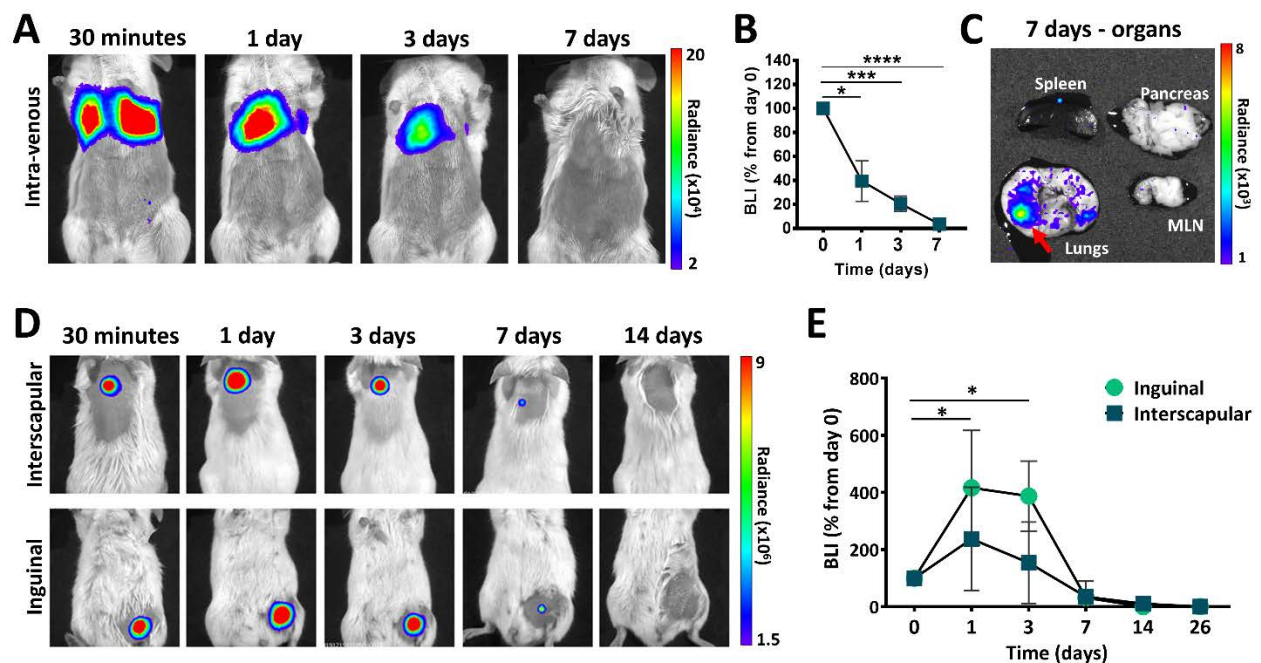

**Supplemental Figure 1. Biodistribution and survival of MSC after intravenous (A-C) or subcutaneous (D-E) transplantation in pre-diabetic NOD females.** (A) BLI time-course images of a mouse transplanted intravenously with Luc<sup>+</sup> MSC; (B) Quantitative data measured from (A) are shown as mean  $\pm$  SEM (n=5) (\*p < 0.05, \*\*\*p < 0.0005, \*\*\*\*p < 0.0001, one-way ANOVA followed by Tukey's test). (C) BLI image of isolated organs at 7 days after intravenous transplantation of Luc<sup>+</sup> MSC. Red arrow indicates the BLI signal localized in the lungs; (D) Representative images of BLI signal of Luc<sup>+</sup> MSC after subcutaneous transplantation in two distinct anatomical regions in one pre-diabetic NOD female; (E) Quantitative data measured from (D) as mean values  $\pm$  SEM (n=8) (\*p < 0.05, two-way ANOVA followed by Tukey's test).

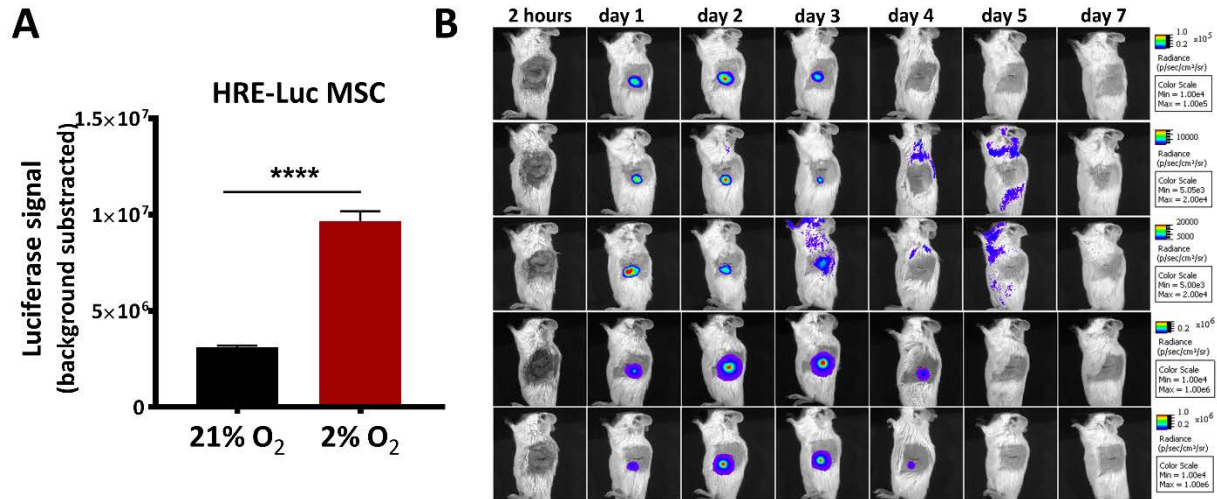

**Supplemental Figure 2. Time-course activation of hypoxia in MSC after intra-pancreatic transplantation in pre-diabetic NOD females.** (A) Assessment of transfection efficiency with the HRE-luciferase plasmid in MSC by analysis of Luc signal in transfected MSC after 24-hour culture under hypoxic conditions (2% O<sub>2</sub>). The data represent mean $\pm$  SEM of three independent experiments. (\*\*\*p < 0.005, Student's t test). (B) Time-course evaluation of 5 different mice after intra-pancreatic transplantation of HRE-Luc-expressing MSC. Note the activation of hypoxia signaling starting with day 1 after transplantation. The quantitative data is given in the main manuscript.

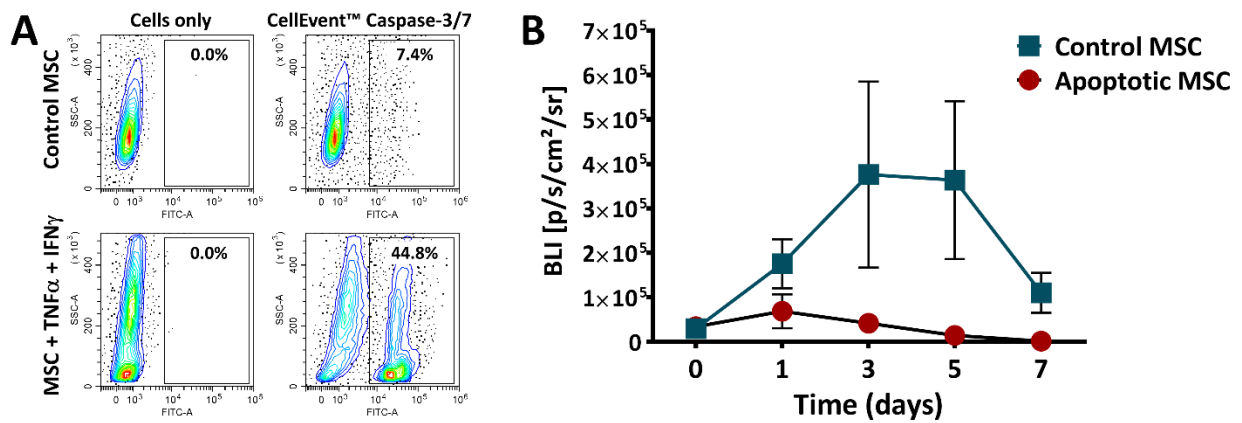

**Supplemental Figure 3. Evaluation of the signal produced by transplantation of apoptotic MSC as a direct comparison to the transplantation of healthy MSC.** (A) Apoptotic MSC were obtained by 48-hour treatment of cells with a mixture of 20 ng/ml TNF $\alpha$  and 20 ng/ml IFN $\gamma$ . Note that around half of MSC were positive for the active form of Caspase-3/7 after the treatment. (B) The survival of control and apoptotic MSC (as whole populations of cultured cells, not-treated and treated with TNF $\alpha$ /IFN $\gamma$ , respectively) after intra-pancreatic transplantation in pre-diabetic NOD females. Data are shown as mean  $\pm$  SEM (n=5 animals per each group).

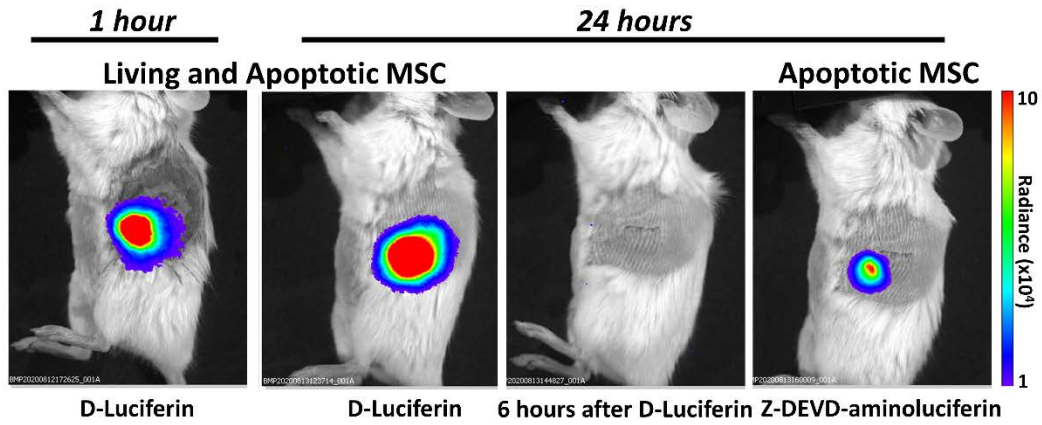

**Supplemental Figure 4. In vivo apoptosis of MSC after intrapancreatic transplantation.** BLI images of a prediabetic NOD female injected intrapancreatically with Luc<sup>+</sup> MSC. Luc signal was detected after D-Luciferin administration (total signal of both healthy and apoptotic cells) or Z-DEVD-aminoluciferin administration (that detected only the apoptotic cells).

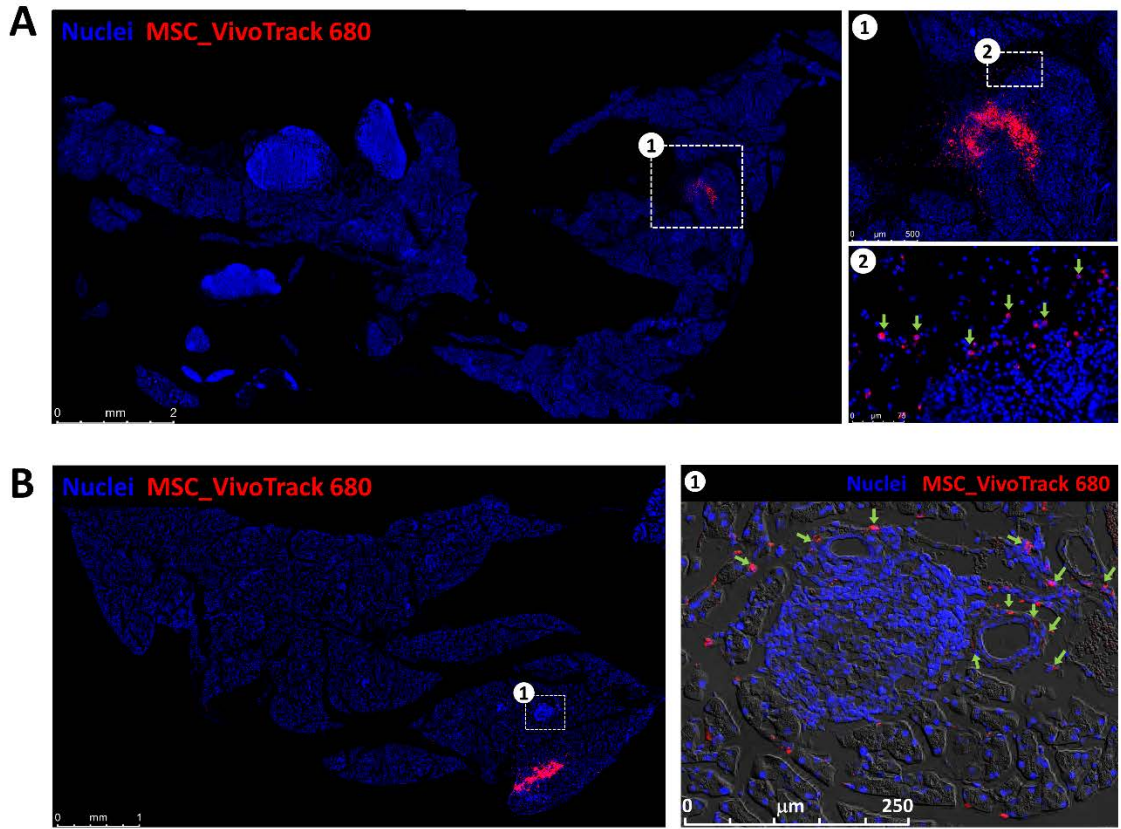

**Supplemental Figure 5. Transplanted MSC do not infiltrate pancreatic islets in NOD mice.** (A) Immunofluorescence image at low magnification obtained from of a section of the pancreas stained with Hoechst 33258 (for cell nuclei) at 7 days after intra-pancreatic transplantation of MSC labelled with Luc and VT680. A higher magnification of the box 1 indicating the transplantation site is showed in the images on the right. Note in the Box 2 the existence of VT680-expressing cells with round morphology (arrows); (B) Immunofluorescence image of a pancreas section showing the transplantation site (the intense red signal) and a nearby large pancreatic islet (box 1). At higher magnification, the box 1 shows VT680-labelled cells surrounding the islet and being located around the vessels, but without penetrating the islet.

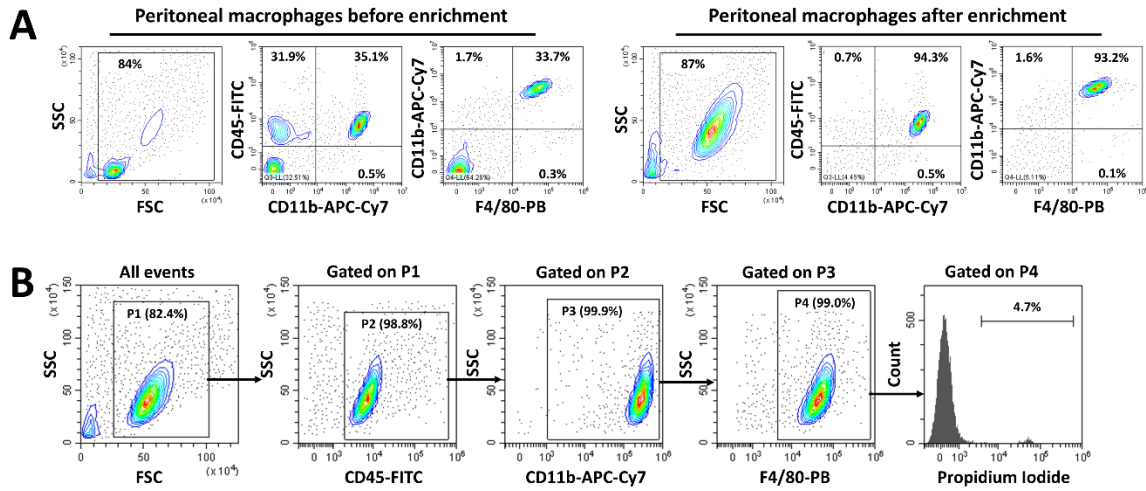

**Supplemental Figure 6. (A)** Frequencies of macrophages ( $CD45^+/CD11b^+/F4/80^+$ ) in unseparated peritoneal lavage (left) versus purified cells, obtained by enrichment of macrophages with EasySep™ Mouse Monocyte Isolation Kit (right). Note the high purity of peritoneal macrophages in the cell suspension after enrichment. **(B)** The viability of purified peritoneal macrophages after enrichment, as determined by Propidium iodide staining. Note the high percentage of viable cells after purification.
